# Supplementary material
Source: PubMed Central journal article supplement (PMC3957943)
Supplement: JVI.03380-13_zjv999098776so1.pdf [file JVI.03380-13_zjv999098776so1.pdf]

## Supplementary Table 1

Prevalence of HLA\*B57-restricted CTL escape mutations found in ES, VC, and CP described in this study.

|                              | Gag          |         |       |              |               | Nef      |              |        |              |       |       | Int        |              |
|------------------------------|--------------|---------|-------|--------------|---------------|----------|--------------|--------|--------------|-------|-------|------------|--------------|
|                              | ISW9         |         | KF11  | TW10         |               | KF9      |              |        | HW9          |       | YY8   | SW10       | SW10         |
|                              | A146P        | I147L/R | A162N | T242N        | G248A/R/T/N/D | K82S/Q/N | L85M/V/F/R/I | L87F/I | H116N        | Y120F | Q125H | T124/A/S/N | T125/A/M     |
| ES                           | 0            | 40      | 0     | 0            | 60            | 20       | 40           | 20     | 20           | 40    | 0     | 40         | 0            |
| VC                           | 33           | 100     | 0     | 67           | 100           | 33       | 33           | 33     | 0            | 0     | 0     | 67         | 33           |
| CP                           | 70           | 80      | 20    | 100          | 70            | 10       | 60           | 40     | 80           | 20    | 20    | 70         | 70           |
| p value (Chi Square Pearson) | <u>0.033</u> | 0.132   | 0.407 | <u>0.001</u> | 0.461         | 0.619    | 0.627        | 0.741  | <u>0.015</u> | 0.407 | 0.407 | 0.52       | <u>0.033</u> |

Values express % of patients in each group harboring each mutation.

# The p value describes the comparison among groups for each mutation. Underlined values are significant (<0.05)

Supplementary Table 2

HLA alleles of the human tissue used to reconstitute the mice . The HLA-A and HLA-B haplotypes for mice used in this study are listed as well as the corresponding HIV-1 isolate that was used for intravenous exposure

| Mouse | HIV-1 isolate | HLA-A | HLA-B |
|-------|---------------|-------|-------|
| 6101  | ES38-5        | 24,31 | 18,51 |
| 6102  | ES38-5        | 24,31 | 18,51 |
| 6103  | ES38-9        | 24,31 | 18,51 |
| 6105  | ES38-9        | 24,31 | 18,51 |
| 6429  | CP6-2E        | 02,68 | 40,48 |
| 6432  | CP4-2B        | 02,68 | 40,48 |
| 6435  | ES8-43        | 02,68 | 40,48 |
| 6438  | ES8-43        | 02,68 | 40,48 |

Supplementary Figure 1. Gag sequence of HIV-1 that corresponds to the real-time PCR primers and Probes. The color highlighted region corresponds to the 5' primer, the orange highlighted region corresponds to the Taqman probe, and the blue highlighted region corresponds to the 3' primer.
